# Supplementary material
Source: Copernicus journal article supplement (doi:10.5194/egqsj-29-173-1979)

# Salinarstrukturen, Tertiärtröge und glaziäre Rinnen in Schleswig-Holstein

Maßstab 1 : 500 000

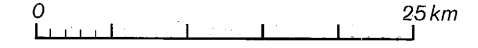

- vermutet
- sicher
- glaziäre Rinnen tiefer als 100 m NN
- Salzstock
- Salzkippen
- Salzkippen, Keupersalinar

Bearbeiter: W. Hinsch

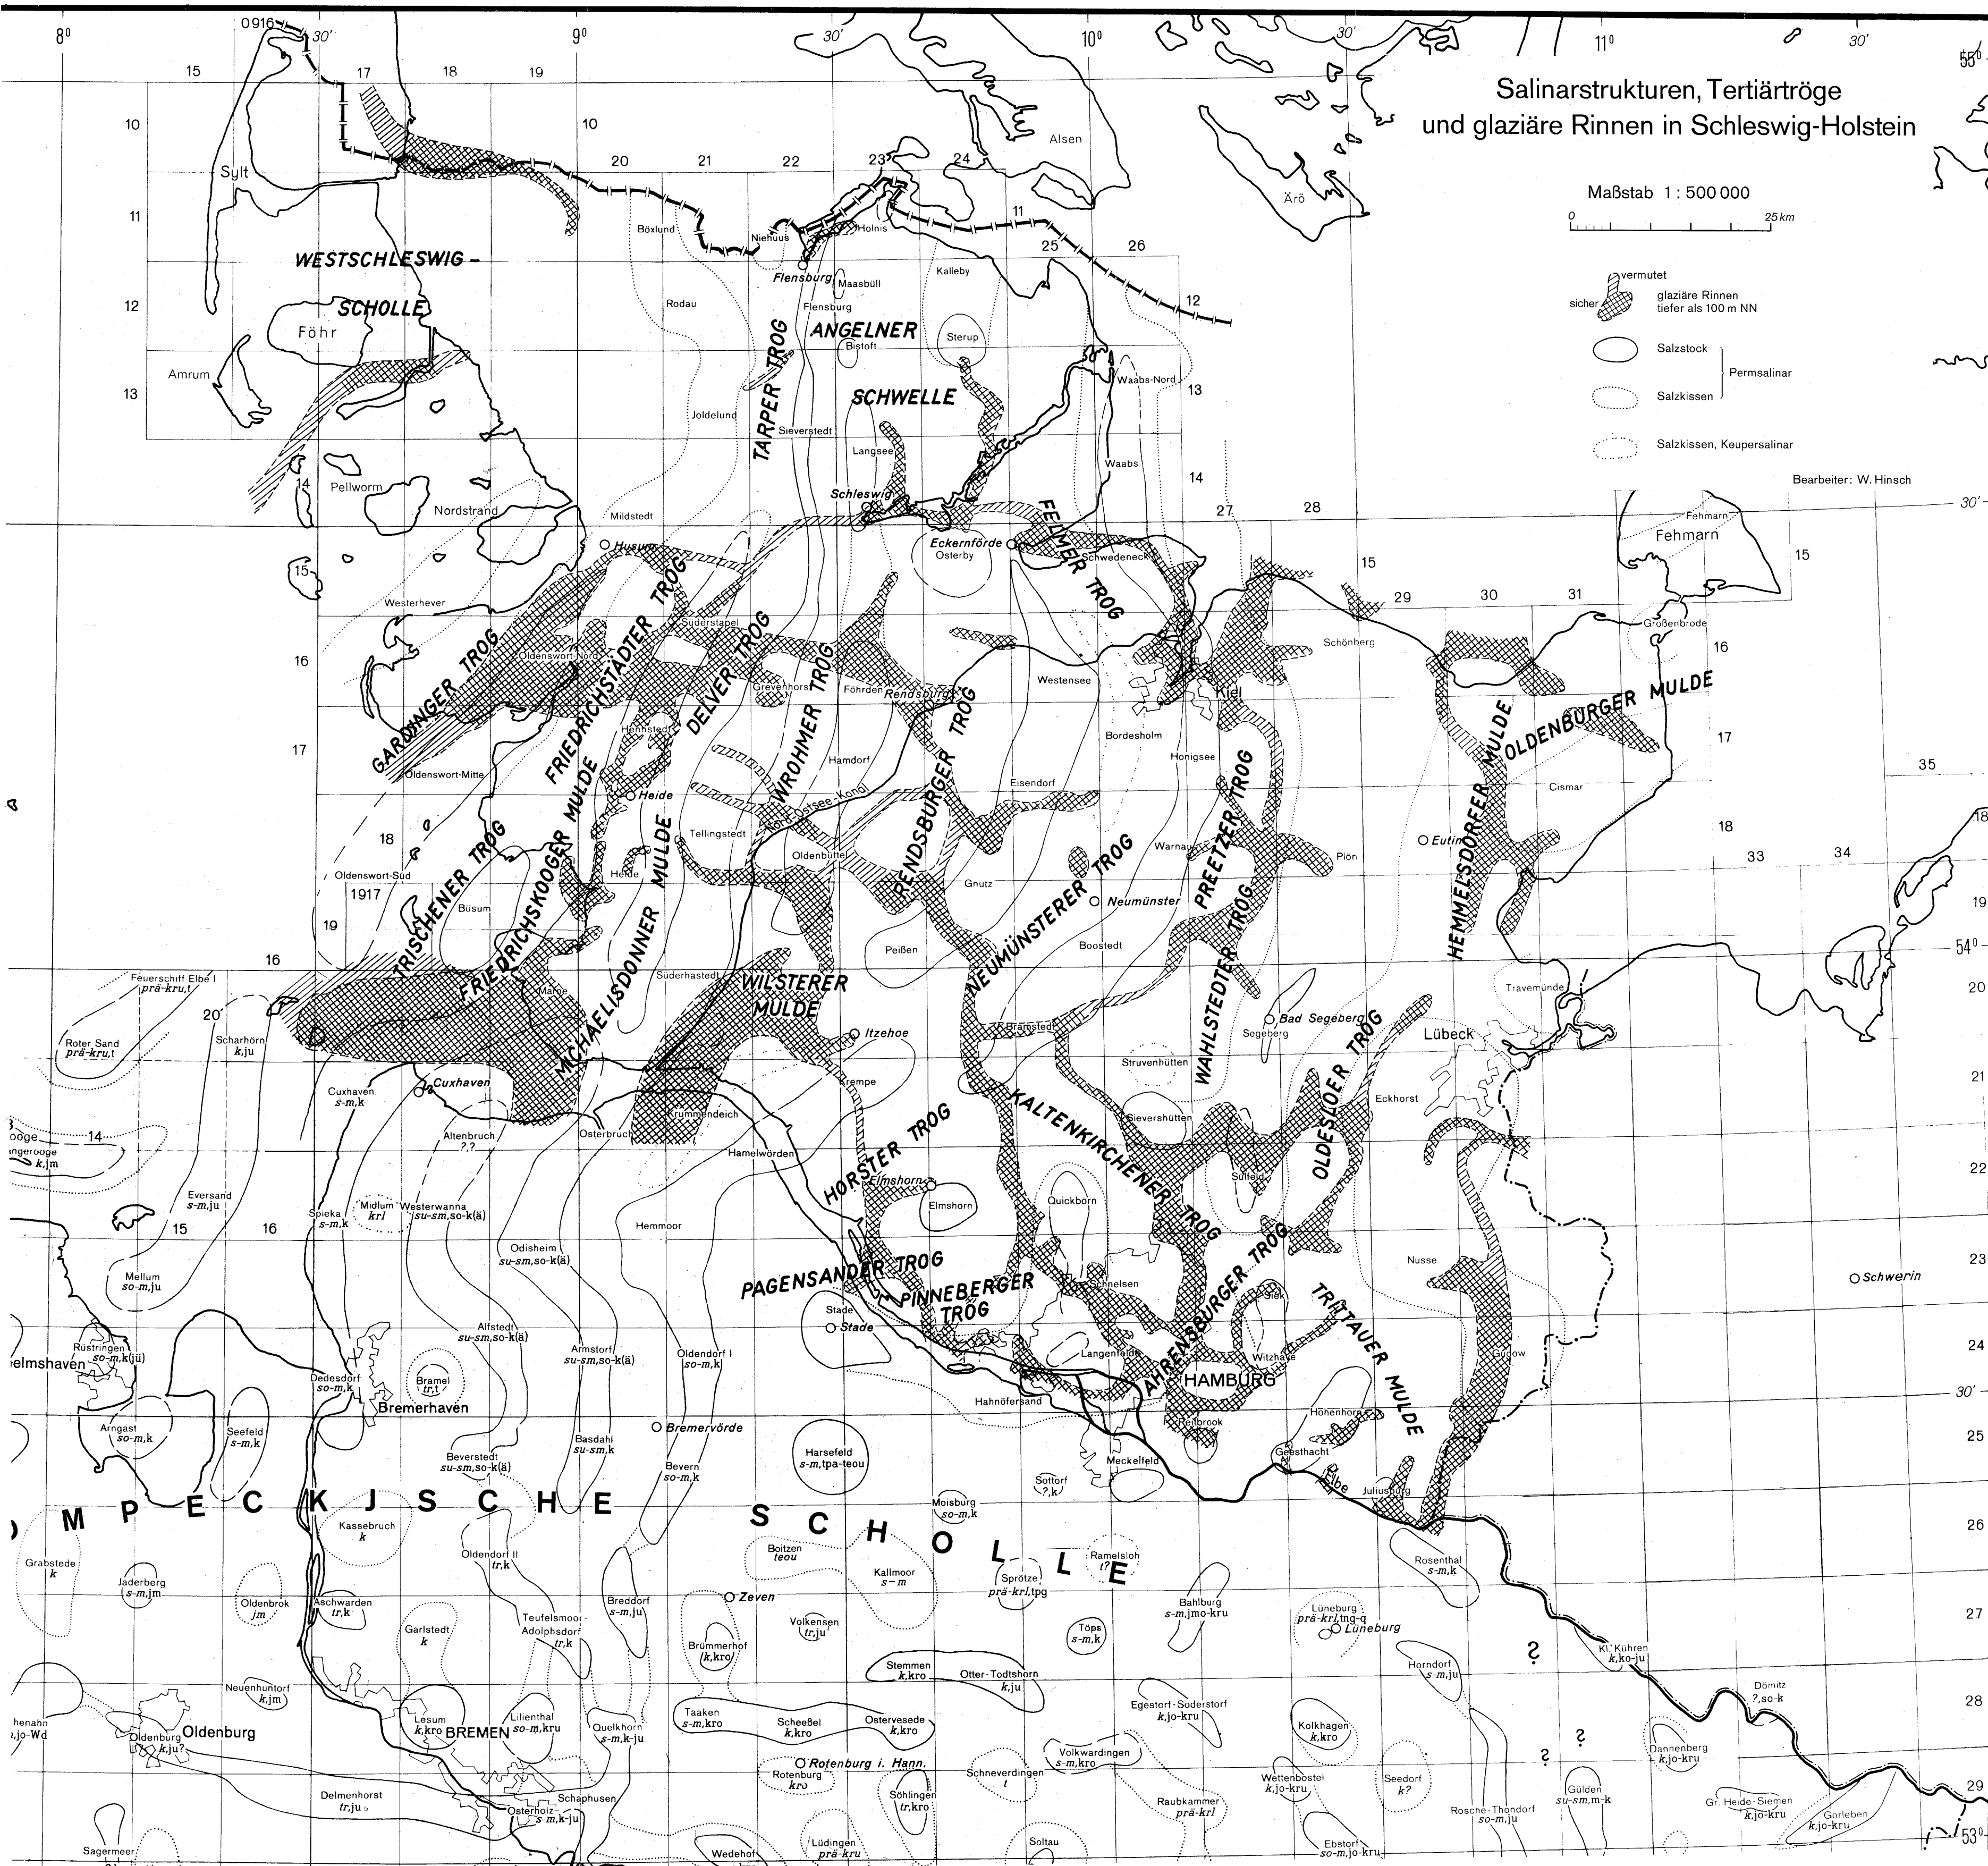

Supplement: Supplementary file 1 [file egqsj-29-173-1979-supplement.pdf]
